# Supplementary material for: Chitooligomer-Immobilized Biointerfaces with Micropatterned Geometries for Unidirectional Alignment of Myoblast Cells
Source: MDPI journal article supplement (doi:10.3390/biom6010012), 2016-01-15

## Supplementary Materials

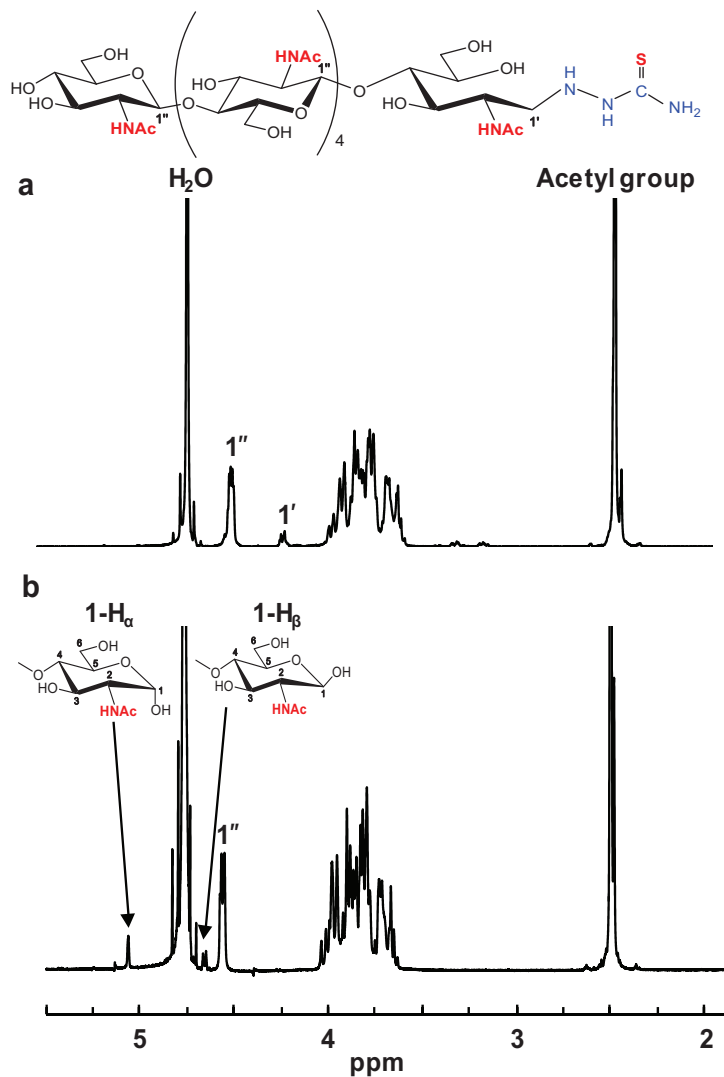

Figure S1.  $^1\text{H}$  NMR spectra of GlcNAc6 with (a) or without (b) TSC derivatization.

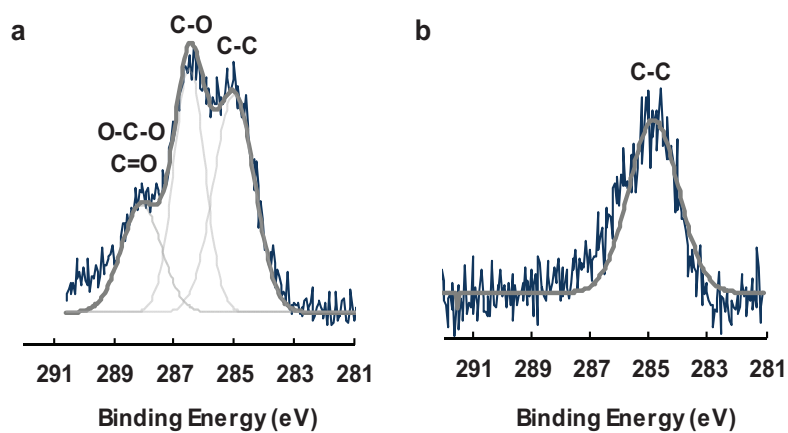

Figure S2. High-resolution XPS spectra of (a) GlcNAc6-immobilized and (b) GlcNAc6-free Au surfaces.

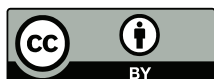

Supplement: s1 [file s1]
